# Supplementary material for: Lactobacillus plantarum NCU116 improves liver function, oxidative stress and lipid metabolism in rats with high fat diet induced non-alcoholic fatty liver disease
Source: Royal Society of Chemistry journal article supplement (doi:10.1039/c4fo00549j), 2014-01-01
Supplement: c4fo00549j1.pdf [file c4fo00549j1.pdf]

**Supplementary Table 1 Primers used for quantitative real-time PCR**

| Gene                           | Sense primer (5'→3')      | Antisense primer (5'→3')      |
|--------------------------------|---------------------------|-------------------------------|
| PPAR $\alpha$                  | GGTCATACTCGCAGGAAA        | AGCAAATTATAGCAGCCAC           |
| PPAR $\gamma$                  | TCAGGGCTGCCAGTTTCG        | GCTTTTGGCATACTCTGTGATCTC      |
| PPAR $\delta$                  | AACGAGATCAGCGTGCATGTG     | TGAGGAAGAGGCTGCTGAAGTT        |
| PGC1 $\alpha$                  | TGAGAGGGCCAAGCAAAG        | ATAAATCACACGGCGCTCTT          |
| CPT1 $\alpha$                  | CGGTTCAAGAATGGCATCATC     | TCACACCCACCACCACGAT           |
| FAS                            | GTCTGCAGCTACCCACCCGTG     | CTTCTCCAGGGTGGGGACCAG         |
| ACC                            | ACAGAGATGGTGGCTGATGTC     | GATCCCCATGGCAATCTG            |
| SCD1                           | TGCCAGAGGGAATAGGGAAA      | CTCTCCCATCCTTACTTACAAACC<br>A |
| <i>Lactobacillus</i> spp.      | AGCAGTAGGGAATCTTCCA       | ATTYCACCGCTACACATG            |
| <i>Bifidobacterium</i> spp.    | CTCCTGGAAACGGGTGG         | GGTGTCTTCCCGATATCTACA         |
| <i>Enterobacteriaceae</i> spp. | CATTGACGTTACCCGCAGAAGAAGC | CTCTACGAGACTCAAGCTTGC         |
| <i>Bacteroides</i> spp.        | ATAGCCTTTCGAAAGRAAGAT     | CCAGTATCAACTGCAATTTTA         |
| $\beta$ -actin                 | TGTTGTCCCTGTATGCCTCT      | TAATGTCACGCACGATTCC           |

**Supplementary Table 2 Fatty acids composition of the two kinds of diet (mg/g)**

| Groups          | HFD            | ND             |
|-----------------|----------------|----------------|
| 14:0            | 0.762 ± 0.018  | 0.106 ± 0.029  |
| 9c14:1          | nd             | nd             |
| 15:0            | 0.057 ± 0.002  | 0.024 ± 0.007  |
| 16:0            | 15.672 ± 0.494 | 2.447 ± 0.706  |
| 9c16:1          | 0.727 ± 0.010  | 0.064 ± 0.018  |
| 17:0            | 0.160 ± 0.003  | 0.017 ± 0.007  |
| 9c17:1          | 0.078 ± 0.008  | 0.010 ± 0.003  |
| 18:0            | 8.721 ± 0.329  | 0.472 ± 0.116  |
| 9t/11t18:1      | 0.006 ± 0.010  | 0.007 ± 0.002  |
| 9c18:1          | 17.309 ± 0.421 | 2.427 ± 0.729  |
| 11c18:1         | 1.015 ± 0.019  | 0.112 ± 0.033  |
| 9c12t/9t12c18:2 | 0.020 ± 0.003  | 0.001 ± 0.002  |
| 9c12c18:2n-6    | 10.321 ± 0.226 | 4.896 ± 1.463  |
| 6c9c12c18:3n-6  | 0.012 ± 0.011  | nd             |
| ctt/cct18:3     | nd             | nd             |
| C20:0           | 0.172 ± 0.007  | 0.043 ± 0.012  |
| ctc/tcc18:3     | nd             | nd             |
| 9c12c15c18:3n-3 | 0.495 ± 0.008  | 0.253 ± 0.077  |
| 11c20:1         | 0.362 ± 0.006  | 0.035 ± 0.010  |
| 20:2n-6         | 0.228 ± 0.005  | 0.006 ± 0.002  |
| 20:3n-6         | 0.046 ± 0.002  | 0.004 ± 0.001  |
| 22:0            | 0.027 ± 0.002  | 0.022 ± 0.006  |
| 20:4n-6         | 0.131 ± 0.003  | 0.024 ± 0.006  |
| 20:5n-3         | 0.090 ± 0.002  | 0.084 ± 0.024  |
| C24:0           | 0.023 ± 0.001  | 0.022 ± 0.006  |
| C22:5n-3        | 0.047 ± 0.001  | 0.017 ± 0.003  |
| C22:6n-3        | 0.142 ± 0.003  | 0.143 ± 0.041  |
| ∑SFA            | 25.593 ± 0.844 | 3.153 ± 0.874  |
| ∑MUFA           | 19.500 ± 0.438 | 2.651 ± 0.793  |
| ∑PUFA           | 11.512 ± 0.247 | 5.428 ± 1.615  |
| ∑trans          | 0.026 ± 0.013  | 0.008 ± 0.004  |
| ∑FA             | 56.630 ± 0.515 | 11.241 ± 0.284 |
